# Supplementary material
Source: ML conference proceedings conference paper supplement (https://proceedings.mlr.press/v139/park21d.html)
Supplement: Supplementary file [file park21d-supp.pdf]

---

# Supplementary Materials for Generative Adversarial Networks for Markovian Temporal Dynamics

---

Sung Woo Park<sup>1</sup> Dong Wook Shu<sup>1</sup> Junseok Kwon<sup>1</sup>

## 1. Mathematical Backgrounds

### 1.1. Notations

In this paper, a time-dependent system is defined on probability space  $(\mathbb{R}^d, \mathcal{F}, \mathbb{P})$  with filtration  $\mathcal{F}_t$ . We assume that generated process  $X_t$  is  $\mathcal{F}_t$ -adapted for all  $t$ .

### 1.2. Assumptions

For rigorous technical results, we assume the following conditions for both generator and discriminator networks.

#### Assumptions for Generator Network.

- **G-H1:** 
$$\|f^\theta(t, x) - f^\theta(t, y)\|^2 \vee \|\sigma(x, \theta) - \sigma(y, \theta)\|^2 \vee \mathbf{Tr}[\sigma(x, \theta)^T \sigma(x, \theta)] \leq K, \quad \forall x, y \in \mathbb{R}^d. \quad (1)$$
- **G-H2:** The infinitesimal generator of the parameterized Fokker-Planck equation induces the curvature-dimension condition:  $CD(\kappa, \infty)$  (Villani, 2008; Bakry & Émery).

#### Assumptions for Discriminator Network.

- **D-H1:** The discriminator network is  $p$ -Lipschitz on  $\mathcal{T}$ , and  $q$ -Lipschitz on  $\mathbb{R}^d$  in a global sense:

$$|D(\cdot, t_1) - D(\cdot, t_2)| \leq p |t_1 - t_2|, \quad |D(X_1, \cdot) - D(X_2, \cdot)| \leq q \|X_1 - X_2\| \quad (2)$$

for all  $t_1 \neq t_2 \in \mathcal{T}$  and  $X_1 \neq X_2 \in \mathbb{R}^d$ .

- **D-H2:** The norm of second derivatives for the discriminator network is always bounded for some value  $\hat{q}$ : *i.e.*,  $\sup_{i,j} \|\partial_i \partial_j D(x, \cdot)\| \leq \hat{q}$ .

### 1.3. Stochastic Differential Equations

In the main paper, we use the integral formulation, but it is generally written as *Itô's diffusion*:

$$dX_t = f^\theta(X_t, t)dt + \sigma(X_t)dW_t, \quad (3)$$

where  $X_t \in \mathbb{R}^d$  and  $f : \mathbb{R}^d \times \mathbf{U} \rightarrow \mathbb{R}^d$  is a neural network parameterized by  $\theta$ .

By the Lipschitz continuity (*i.e.*, **G-H1**) of both drift and diffusion functions, the solution to (3),  $X_t$ , is always a Markov process (Øksendal, 2003).

## 2. Proofs

**Proposition 1.** (*Controlled Stability of Discriminator*) Let  $G(X_0, s) = X_s$  be a generated sample obtained by the generator  $G$ . For simple analysis, let us consider  $\sigma(X) := \sigma$  for some positive scalar  $\sigma > 0$ .<sup>1</sup> Then, the following probability

---

<sup>1</sup>The result of this proposition can be easily extended to general measurable  $\sigma(\cdot)$ , if we clarify the explicit condition on  $\sigma$ .

inequality is satisfied:

$$\mathbb{P} \left[ \sup_{0 \leq s \leq t} \|D(X_s, s) - D(X_0, 0)\| \geq \epsilon \right] \leq \frac{2}{3\epsilon} \left\{ (p \vee q) \mathbb{E} \|X_t - X_0\| + tC \right\}, \quad (4)$$

where the numerical constant  $C$  is linearly dependent on  $\sigma$ . In other words,  $C \propto \sigma$ .

*Proof.* It is difficult to directly analyse the time-inhomogeneous Feller process,  $X_t$ , without appropriate and complicated assumptions on  $f^\theta$ . Because using a time-variable is to generate high-dimensional and complex data, we transform the time-inhomogeneous Markov process,  $X_t$ , into a desirable form and analyze probabilistic properties of  $X_t$ . Let  $\tilde{X}_t = (X_t, t)$  be a time-augmented stochastic process suggested in (Bossy & Champagnat, 2010; Böttcher, 2014), it is easily shown that the aforementioned time-augmented Markov semigroup can be defined. Let  $\mathcal{F}_t = \sigma(X_s; s \leq t)$  be a canonical filtration of  $X_t$ . Let  $\mu \in \mathcal{P}(\mathbb{R}^d)$  be a probability measure and define  $\mathbb{P} := \mathbb{P}^\mu(X_0 \in A) \otimes \mathcal{T}(t_0 \in T)$  for all  $A \in \Sigma(\mathbb{R}^d \times \mathcal{T})$ .

**Theorem 1.** (Böttcher, 2014) *Let  $\mathcal{T} = [0, C]$ , assume that  $X_t$  is a time-inhomogeneous Feller process and has right-continuous infinitesimal generator  $A_s^+$ . Let  $f \in C_\infty(\mathbb{R}^d \times \mathcal{T})$ ,  $\pi_1 \circ f \in C^1(\mathcal{T})$ ,  $\pi_2 \circ f \in \mathcal{D}(A_s^+)$ . Then,  $\tilde{X}_t$  is a time-homogeneous Feller process with generator  $\tilde{L}$  defined as follows:*

$$Lf(\tilde{X}) = \partial_s f(s, x) + A_s^+ f(s, x), \quad (5)$$

where  $A_s^+ f(s, \cdot) = \frac{\sigma}{2} \sum_i^d \nabla_i^2 f(s, \cdot) + \nabla^T f(s, \cdot)$ .

Based on the tools above, we reveal the impact to the probabilistic bound of perturbation according to varying magnitudes of  $\sigma$  in our SDE model. Let us first define the stochastic process  $M_t^D : \mathbb{R}^d \times \mathcal{T} \rightarrow \mathbb{R}$  as follows:

$$M_t^D = D(\hat{X}_t) - D(\hat{X}_0) - \int_0^t (\partial_u + A_u^+) D(X_u, u) du. \quad (6)$$

This form is the time-inhomogeneous type of martingale formulation (Bossy & Champagnat, 2010) for itô's formula over discriminator  $D$ , i.e.,  $\mathbb{E}[M_t^D | \mathcal{F}_s] = M_s^D$ . In this form, the distortions induced by inhomogeneity are compensated by differential operator  $\partial_s$ . As  $M_t^D$  is martingale, one can induce the following probability inequality by applying Doob's maximal martingale inequality (Øksendal, 2003) to  $M_t^D$ :

$$\mathbb{P} \left[ \sup_{0 \leq s \leq t} \|M_s^D\|_2 \geq \epsilon \right] \leq \frac{1}{\epsilon^2} \mathbb{E} [\|M_t^D\|]. \quad (7)$$

From (7), we can obtain the following inequality:

$$\begin{aligned} \epsilon &\leq \sup_{0 \leq s \leq t} \|M_s^D\|_2 \leq \sup_{0 \leq s \leq t} \left[ \|D(X_s, s) - D(X_{s=0}, s=0)\|_2 + \left\| \int_0^t -\partial_u D(X_u, u) du \right\|_2 + \left\| \int_0^t -A_u^+ D(X_u, u) du \right\|_2 \right] \\ &\leq \sup_{0 \leq s \leq t} \|D(X_s, s) - D(X_{s=0}, s=0)\|_2 + \sup_{0 \leq s \leq t} \int_0^t \|\partial_u D(X_u, u)\|_2 du + \sup_{0 \leq s \leq t} \int_0^t \|A_u^+ D(X_u, u)\|_2 du. \end{aligned} \quad (8)$$

The second inequality is induced by applying Jensen's inequality to Lebesgue measure  $du$  with convex function  $\|\cdot\|_2$ , and the inequality  $\sup_s [A(s) + B(s) + C(s)] \leq \sup_s A(s) + \sup_s B(s) + \sup_s C(s)$ .

$$\begin{aligned} \frac{1}{\epsilon^2} \mathbb{E} [\|M_t^D\|] &\geq \mathbb{P} \left[ \epsilon \leq \sup_{0 \leq s \leq t} \|M_s^D\|_2 \right] \geq \mathbb{P} \left[ \frac{\epsilon}{3} \leq \sup_{0 \leq s \leq t} \|D(X_s, s) - D(X_0, 0)\|_2 \right] \\ &\quad + \mathbb{P} \left[ \frac{\epsilon}{3} \leq \sup_{0 \leq s \leq t} B(t) \right] + \mathbb{P} \left[ \frac{\epsilon}{3} \leq \sup_{0 \leq s \leq t} C(t) \right]. \end{aligned} \quad (9)$$

By rewriting inequality above using  $\mathbb{P}(A^c) = 1 - \mathbb{P}(A)$ ,  $\forall A \in \Sigma$ , and rescaling dummy variable  $\epsilon \rightarrow 3\epsilon$ , we get

$$\mathbb{P} \left[ \epsilon \leq \sup_{0 \leq s \leq t} \|D(\tilde{X}_s) - D(\tilde{X}_0)\|_2 \right] \leq \frac{1}{3\epsilon} \mathbb{E} [\|M_t^D\|] + \mathbb{P} \left[ \epsilon \geq \sup_{0 \leq s \leq t} B(t) \right] + \mathbb{P} \left[ \epsilon \geq \sup_{0 \leq s \leq t} C(t) \right] - 2. \quad (10)$$

Then, we use the assumptions to remove second and third term in (10). While we assume that  $D$  is global  $p$ -Lipschitz continuous on  $\mathcal{T}$ , the following inequality is induced by **D-H1**.

$$\mathbb{P}\left[|D(X, t_1) - D(X, t_2)| \leq p \|(X, t_1) - (X, t_2)\| = p|t_1 - t_2|\right] = 1. \quad (11)$$

Let us assume  $\epsilon \leq pt$ . As the inequality in (11) is equivalent to  $\|\partial_u D\| \leq p$  iff  $D$  is  $p$ -Lipschitz continuous, the second term in right-hand side of (10) is naturally bounded above with the following inequality because we assume that  $\epsilon \leq pt$ . Subsequently, we get followings:

$$\begin{aligned} \mathbb{P}\left[\sup_{0 \leq s \leq t} B(t) \leq \epsilon\right] &\leq \mathbb{P}\left[\sup_{0 \leq s \leq t} \int_0^t \|\partial_u D(G(X_0, u), u)\| du \leq \sup_{0 \leq s \leq t} \int_0^t pdu = pt\right] \\ &\leq \mathbb{P}\left[\sup_{0 \leq s \leq t} \int_0^t \|\partial_u D(X_u, u)\| du \leq pt\right] = 1. \end{aligned} \quad (12)$$

As our discriminator is assumed to be  $q$ -Lipschitz on data dimension, the following inequality is naturally induced. The probability densities,  $P$  and  $Q$  induced by both  $d\mathbb{P}_t = p_t(x)d\mathcal{L}(x)$ ,  $d\mathbb{Q}_t = q_t(x)d\mathcal{L}(x)$  for Lebesgue measure  $\mathcal{L}(x)$  with respect to  $\mathbb{R}^d$ , and  $U_{P,Q} := \text{supp}(p_t) \cup \text{supp}(q_t) \subset \mathbb{R}^d$ . Based on the assumption that  $D(\cdot, t)$  is global  $p$ -Lipschitz continuous for any  $t \in \mathcal{T}$ , we can induce the following set inclusion:

$$\{w : D[G(X_0, t)(w), t] \in \text{Lip}_p(U_{P,Q})\} \subset \{w : D(Y(w), t) \in \text{Lip}_p(\mathbb{R}^d), \forall Y \in \mathbb{R}^d\}. \quad (13)$$

Assume that  $D(\cdot, t)$  vanishes outside of  $\text{supp}(p_t)$ . Then, in probability, we can induce

$$\mathbb{P}[D[G(X(w), t), t] \in \text{Lip}_p(\text{supp}(P))] \leq \mathbb{P}[D(X, t) \in \text{Lip}_p(\mathbb{R}^d)] = \mathbb{P}[\|\nabla_i D(X, t)\| \leq q] = 1. \quad (14)$$

$$\|A_s^+ D(X_s, s)\| \leq \frac{\sigma}{2} \underbrace{\left\| \sum_i^d \nabla_i^2 D(X_s, s) \right\|}_{\text{bounded second derivative}} + \underbrace{\left\| \sum_i^d \nabla_i D(X_s, s) \right\|}_{q\text{-Lipschitz on data space}} \leq 2^{-1}\sigma d \sup_{0 \leq i \leq d} \hat{q}_i + q. \quad (15)$$

We denote  $\hat{q} = \sup_{0 \leq i \leq d} \hat{q}_i$  for simplicity. The following equality is naturally induced by the assumption **D-H2**.

$$\mathbb{P}[\|A_s^+ D(X_s, s)\| \leq 2^{-1}\sigma d \hat{q} + q] = 1, \forall 0 \leq s \leq t. \quad (16)$$

If  $\epsilon \leq 2^{-1}\sigma d \hat{q} + q$ , this naturally induces the following probability inequality:

$$\mathbb{P}\left[\sup_{0 \leq s \leq t} C(t) \leq \epsilon\right] \leq \mathbb{P}\left[\sup_{0 \leq s \leq t} \int_0^t \|A_u^+ D(X_u, u)\| du \leq (2^{-1}\sigma d \hat{q} + q)t\right] = 1. \quad (17)$$

**Lemma 1.** *The discriminator network  $D$  is  $2(p \vee q)$ -Lipschitz on  $\mathbb{R}^d \times \mathcal{T}$ .*

*Proof.* The proof is trivial by the triangle inequality.

$$\begin{aligned} |D(X_1, t_1) - D(X_2, t_2)| &\leq |D(X_1, t_1) - D(X_1, t_2)| + |D(X_1, t_2) - D(X_2, t_2)| \\ &\leq p|t_1 - t_2| + q\|X_1 - X_2\| \\ &\leq 2(p \vee q)[|t_1 - t_2| + \|X_1 - X_2\|] = 2(p \vee q)\|(X_1, t_1) - (X_2, t_2)\|. \end{aligned} \quad (18)$$

□

By integrating inequalities in (17) and (12) into (10), we can obtain the following inequality:

$$\begin{aligned} \mathbb{P}\left[\sup_{0 \leq s \leq t} \|D(X_s, s) - D(X_0, 0)\| \geq \epsilon\right] &\leq \frac{1}{3\epsilon} \mathbb{E}[\|M_t^D\|] \leq \frac{1}{3\epsilon} \left\{ \mathbb{E}\|D(X_t, t) - D(X_0, 0)\| + t[p + q + 2^{-1}\sigma d \hat{q}] \right\} \\ &\leq \frac{2}{3\epsilon} \left\{ (p \vee q) \mathbb{E}\|X_t - X_0\| + t[2(p \vee q) + 4^{-1}\sigma d \hat{q}] \right\}, \end{aligned} \quad (19)$$

where  $\epsilon = [p \wedge (2^{-1}\sigma d\hat{q} + q)]t$ . The second inequality induced by the fact that  $D$  is global  $2(p \vee q)$ -Lipschitz continuous by Lemma 1, and the metric on  $\mathbb{R}^d \times \mathcal{T}$  can be decomposed into metrics on  $\mathbb{R}^d$  and  $\mathcal{T}$ .

$$\|\mathbb{E}[D(X_t, t) - D(X_0, 0)]\| \leq \mathbb{E}\|D(X_t, t) - D(X_0, 0)\| \leq 2(p \vee q)\mathbb{E}\|\hat{X}_t - \hat{X}_0\| \leq 2(p \vee q)(\mathbb{E}\|X_t - X_0\| + t). \quad (20)$$

The proof is completed by setting  $C(p, q, \sigma, d, \|\nabla^2 D\|) = 2(p \vee q) + 4^{-1}\sigma d\hat{q}$ . Please note that this numerical constant is linearly dependent on  $\sigma$ .  $\square$

**Proposition 2.** (Controlled Stability of Wasserstein distance) *Let us define the spatial-temporal gradient operator as  $\tilde{\nabla}_{x,t} = \nabla_x + \partial_t$ . Then, the expectation norm of the spatial-temporal gradient for the conditional distance is bounded as follows:*

$$\mathbb{E}\left[\left\|\tilde{\nabla}_{x,t}\mathcal{W}^\varphi(\mathbb{P}_t|x, \mathbb{Q}_t)\right\|\right] \leq C + (p \vee q)(1 + e^{-\kappa t}) \quad (21)$$

for some numerical constants  $\kappa, C > 0$ .

*Proof.* The left-hand side of inequality in (21) can be divided into two terms as follows:

$$\mathbb{E}\left[\left\|\tilde{\nabla}_{x,t}\mathcal{W}^\varphi(\mathbb{P}_t|x, \mathbb{Q}_t)\right\|\right] \leq \mathbb{E}\left[\left\|\nabla\mathcal{W}^\varphi(\mathbb{P}_t|x, \mathbb{Q}_t)\right\|\right] + \left\|\partial_t\mathcal{W}^\varphi(\mathbb{P}_t|x, \mathbb{Q}_t)\right\|. \quad (22)$$

First, We investigate the first term of right-hand side in (22):

$$\begin{aligned} \mathbb{E}_x\|\nabla\mathcal{W}^\varphi(\mathbb{P}_t|x, \mathbb{Q}_t)\| &= \int \|\nabla M_t D^\varphi(x, 0) - \nabla\mathbb{E}_{Y_t \sim \mathbb{Q}_t} D^\varphi(Y_t, t)\| d\mathbb{P}_0(x) \leq \int e^{-\kappa t} \mathbb{E}_x M_t (\|\nabla D(x)\|) d\mathbb{P}_0(x) \\ &= e^{-\kappa t} \int \|\nabla D_1\|(x) p(t, y|0, x) p_0(x) d\mathcal{L}(x) = e^{-\kappa t} \int \|\nabla D_1\| d\mathbb{P}_t = e^{-\kappa t} \mathbb{E}\left[\|\nabla D(X_t)\|\right] \\ &\leq e^{-\kappa t} q. \end{aligned} \quad (23)$$

The first inequality is induced by the assumption **G-H2** on curvature-dimension condition  $CD(\kappa, \infty)$  of our parameterized Fokker-Planck equation. By the spatial constraints assumption **D-H2**, The last inequality is induced as  $\|\nabla D\| \leq q$ ,  $d\mathbb{P}_t(x)$ -almost surely. Subsequently, we investigate the second term of right-hand side in (22):

$$\begin{aligned} \mathbb{E}_x\|\partial_t\mathcal{W}^\varphi(\mathbb{P}_t|x, \mathbb{Q}_t)\| &= \int \|\partial_t M_t D^\varphi(x, 0) - \partial_t \mathbb{E}_{Y_t \sim \mathbb{Q}_t} D^\varphi(Y_t, t)\| d\mathbb{P}_0(x, 0) \\ &= \int \|M_t L D^\varphi(x, 0) - \mathbb{E}[\partial_t D^\varphi(Y_t, t)]\| d\mathbb{P}_0(x) \\ &\leq \int \|M_t L D^\varphi(x, 0)\| d\mathbb{P}_0(x) + \int \mathbb{E}\left[\|\partial_t D^\varphi(Y_t, t)\|\right] d\mathbb{P}_0(x) \\ &\leq \int M_t \left[\|\partial_t D(x, t)\| + \frac{\sigma}{2} d \sup_{0 \leq i \leq d} \hat{q}_i + \|\nabla D(X)\|\right] d\mathbb{P}_0(x) \\ &= p + \frac{\sigma}{2} d \sup_{0 \leq i \leq d} \hat{q}_i + \mathbb{E}\|\nabla D(X_t)\| \leq p + q + 2^{-1}\sigma d\hat{q}. \end{aligned} \quad (24)$$

The first inequality is induced by the dual identity of Fokker-Planck equation:  $\partial_t M_t f = M_t L f$  for Markovian generator  $L$ , and we use the fact that  $\partial_t \mathbb{E} f(x, t) = \mathbb{E} \partial_t f(x, t)$  for bounded and second differentiable  $f(x, t)$ . The second inequality is induced by dividing  $L$  defined in Theorem 1 into two terms. The third equality holds as  $\mathbb{E}_{x_0} M_t \|\nabla D(X_0)\| = \mathbb{E}\|\nabla D(X_t)\|$ , which is bounded above  $q$  almost surely. Combining these results, it is easy to see that the following inequality is satisfied:  $2^{-1}\sigma d\hat{q} + p + (1 + e^{-\kappa t})q \leq 2^{-1}\sigma d\hat{q} + (p \vee q)(1 + e^{-\kappa t})$  where  $C = 2^{-1}\sigma d\hat{q}$ . By the fact that  $\int e^{-\kappa t} dt \leq \frac{1 - e^{-\kappa T}}{\kappa}$ , the proof is completed.  $\square$

**Proposition 3.** *Let  $V^\lambda$  be the function defined above, and  $x, \hat{x}$  be two initial states such that  $\hat{\mathbb{P}}_t = h_{\#}[\mathbb{P}_t]$ . If the generator solves the regularization term in (25), such that*

$$\min_{\theta} \mathbb{E}_{X_t \sim \mathbb{P}_t, Z_t \sim \hat{\mathbb{P}}_t} V^\lambda(\theta, X_t, Z_t) = 0, \quad (25)$$

the following inequality holds:

$$\mathcal{W}_2(\mathbb{P}_t, \hat{\mathbb{P}}_t) \leq \sqrt{A + e^{-2\lambda t} \|h\|_{\mathbf{L}_2(\mathbb{P})}}, \quad (26)$$

where  $\|\cdot\|_{\mathbf{L}_2(\mathbb{P})}$  denotes  $L_2$ -norm over probability measure  $\mathbb{P}$ , for some  $A > 0$ .

*Proof.* Assume that the function  $V^\lambda$  vanishes for some for some fixed  $x, y$  and parameter  $\theta^*$ . That is,  $V^\lambda(\theta^*, x, y) := 0$ . In this case, (25) indicates the following inequality:

$$(x - y)^T \left[ \nabla f_{\alpha x + (1-\alpha)y}^{\theta^*} \right] (x - y) \leq -\lambda(x - y)^T I(x - y), \quad (27)$$

where we simply denote  $\nabla f^{\theta^*} = \nabla_x f(\theta^*, x, t)$  for the fixed  $t$ . The drift function satisfying the inequality above is called *contraction function*. By the Theorem 2 (Pham et al., 2009), this property gives powerful stochastic contraction for processes  $X_t^x, X_t^y$  starting at different initial states  $x \sim \mu, y \sim \nu$ . In particular, any diffusion Markov process of which drift functions satisfy inequality in (27) can induce the following property:

$$\mathbb{E} \|X_t^x - X_t^y\|^2 \leq \frac{K}{\lambda} + e^{-2\lambda t} \int_{\mathcal{A}} \|x - y\|^2 d(\mu \otimes \nu), \quad (28)$$

where  $\mathcal{A} = \text{supp}(\mu_0) \cup \text{supp}(\nu_0) \subset \mathbb{R}^d$ . Let us consider  $\hat{x} = x + h(x)$  for some measurable  $h$ . As the optimal transport between  $\mathbb{P}_t^x, \mathbb{P}_t^y$  always exists, which is denoted as  $\pi_t^{x,y}$ , inducing the followings are straightforward.

We consider the system of SDEs consist of trained drift, diffusion functions  $f(\theta^*)$ , and  $\sigma(\theta^*)$  with different initial states.

$$\begin{cases} dX_t = f(\theta^*, X_t, t) + \sigma(X_t) dW_t^1 \\ d\hat{X}_t = f(\theta^*, \hat{X}_t, t) + \sigma(\hat{X}_t) dW_t^2 \end{cases} \quad (29)$$

with i.i.d Wiener processes  $W_t^1, W_t^2$ . In this case, it is easy to see that  $Z_t = (X_t, \hat{X}_t)$  is also a Markov process on  $\mathbb{R}^d \times \mathbb{R}^d$ . We define  $\iota(Z_t) = d^2(X_t, \hat{X}_t)$  for the Euclidean metric  $d$  on  $\mathbb{R}^d$  and define  $\Pi$  as an optimal transport between initial state measures  $\mu$  and  $\nu$ . Expectation of Markov semi-group  $M_t \iota$  over  $\pi$  yields followings:

$$\begin{aligned} \int_{\mathcal{A}^2} M_t \iota(z) d\Pi &= \int_{\mathcal{A}^2} \mathbb{E}[\iota(Z_t) | z = (x, y)] d\Pi(x, y) = \int_{\mathcal{A}^2} \mathbb{E} \left[ d^2(X_t, \hat{X}_t)^2 \middle| (X_0, \hat{X}_0) = (x, y) \right] d\Pi(x, y) \\ &\leq \frac{K}{\lambda} + e^{-2\lambda t} \int_{\mathcal{A}^2} \int_{\mathcal{A}} \iota(Z_0) d(\mu \otimes \nu) d\Pi(x, y) = \frac{K}{\lambda} + e^{-2\lambda t} \mathcal{W}_2^2(\mu, \nu) = \frac{K}{\lambda} + e^{-2\lambda t} \|h\|_{\mathbf{L}_2(\mu)}^2. \end{aligned} \quad (30)$$

$\Gamma_t = \mathbb{E}_{z \sim \Pi} p(t, z, \cdot)$  denotes a push forward of  $\Pi$  through transition kernel. Then, for the any  $Z_t$ ,

$$\mathcal{W}_2^2(\mathbb{P}_t^{x \sim \mu}, \mathbb{P}_t^{\hat{x} \sim \nu}) = \inf_{\Pi_t} \int \iota(Z_t) d\Pi_t(Z_t) \leq \int \iota d\Gamma_t. \quad (31)$$

By combining two inequalities above and the fact that  $\mathbb{E}_{\Pi}[M_t \iota] = \mathbb{E}_{\Gamma_t}[\iota]$ , we can conclude that  $\mathcal{W}_2(\mathbb{P}_t^x, \mathbb{P}_t^{\hat{x}}) \leq \sqrt{\frac{K}{\lambda} + e^{-2\lambda t} \|h\|_{\mathbf{L}_2(\mu)}^2}$ , where  $A = K\lambda^{-1}$ . □

## References

- Bakry, D. and Émery, M. Diffusions hypercontractives. *Séminaire de probabilités de Strasbourg*, pp. 177–206.
- Bossy, M. and Champagnat, N. Markov processes and parabolic partial differential equations. In *Encyclopedia of Quantitative Finance*, pp. 1142–1159. 2010.
- Böttcher, B. Feller evolution systems: Generators and approximation. *Stochastics and Dynamics*, 14(03):1350025, 2014.
- Øksendal, B. Stochastic differential equations. In *Stochastic differential equations*, pp. 65–84. Springer, 2003.
- Pham, Q.-C., Tabareau, N., and Slotine, J.-J. A contraction theory approach to stochastic incremental stability. *IEEE Transactions on Automatic Control*, 54(4):816–820, 2009.
- Villani, C. *Optimal Transport: Old and New*. Springer Berlin Heidelberg, 2008.
